# Supplementary material for: National Surveillance of Injury in the Republic of Korea: Increased Injury Vulnerability in the Late Middle Age
Source: MDPI journal article supplement (doi:10.3390/ijerph18031210), 2021-01-29
Supplement: s1 [file s1]

**Table S1** Equivalents of ICECI version 1.2 and EDIIS codes: Place of occurrence, Mechanism of injury, Activity when injured, Alcohol use, Intent.

| manuscript                                                    | ICECI                                                               |                                                                                                                                                                                                                                                  | EDIIS                                                                                                        |
|---------------------------------------------------------------|---------------------------------------------------------------------|--------------------------------------------------------------------------------------------------------------------------------------------------------------------------------------------------------------------------------------------------|--------------------------------------------------------------------------------------------------------------|
| <b>Place of occurrence</b>                                    | <b>Place of occurrence (C4=1-12, 98, 99)</b>                        |                                                                                                                                                                                                                                                  | <b>Place of occurrence (23)</b>                                                                              |
| - Transport area                                              | - Transport area: public highway, street or road (C4=6)             |                                                                                                                                                                                                                                                  | C6(C6.1, C6.2, C6.3, C6.8, C6.9)                                                                             |
|                                                               | - Transport area: other (C4=7)                                      |                                                                                                                                                                                                                                                  | C7(C7.1,C7.3, C7.9,C7.9)                                                                                     |
| - Home                                                        | - Home (C4=1)                                                       |                                                                                                                                                                                                                                                  | C1                                                                                                           |
| - Commercial, recreational, cultural area, or public building | - Commercial area (11)                                              |                                                                                                                                                                                                                                                  | C11                                                                                                          |
|                                                               | - Recreational area, cultural area or public building (C4=10)       |                                                                                                                                                                                                                                                  | C10                                                                                                          |
| - Sport and athletics area                                    | - Sport and athletics area (C4=5)                                   |                                                                                                                                                                                                                                                  | C5(C5.1,C5.2,C5.3,C5.6,C5.7,C5.8,C5.9)                                                                       |
| - Farm, industrial or construction area                       | - Farm or other place of primary production (C4=9)                  |                                                                                                                                                                                                                                                  | C9                                                                                                           |
|                                                               | - Industrial or construction area (C4=8)                            |                                                                                                                                                                                                                                                  | C8                                                                                                           |
| - Countryside                                                 | - Countryside (C4=12)                                               |                                                                                                                                                                                                                                                  | C12                                                                                                          |
| - Medical service area                                        | - Medical service area (C4=3)                                       |                                                                                                                                                                                                                                                  | C3                                                                                                           |
| - School/educational area                                     | - School, educational area (C4=4)                                   |                                                                                                                                                                                                                                                  | C4                                                                                                           |
| - Residential institution                                     | - Residential institution (C4=2)                                    |                                                                                                                                                                                                                                                  | C2                                                                                                           |
| - Others and unknown                                          | - Other specified place of occurrence (C4=98)                       |                                                                                                                                                                                                                                                  | C98                                                                                                          |
|                                                               | - Unspecified place of occurrence (C4=99)                           |                                                                                                                                                                                                                                                  | C99                                                                                                          |
| <b>Mechanism of injury</b>                                    | <b>Mechanism of injury (C2=1-8, 20, 98, 99)</b>                     |                                                                                                                                                                                                                                                  | <b>Mechanism of injury (20)</b>                                                                              |
| - Transport injury event                                      | - Blunt force (C2=1)<br>(C2=1.1, 1.2, 1.3, 1.4, 1.5, 1.6, 1.8, 1.9) | - Transport injury event (C2=1.1)                                                                                                                                                                                                                | C11 (C11.10, C11.20, C11.45, C11.61, C11.67, C11.70, C11.82, C11.84, C11.88, C11.90, C11.92, C11.98, C11.99) |
| - Falling, slipping                                           |                                                                     | - Falling, stumbling, jumping pushed (C2=1.5)                                                                                                                                                                                                    | C12 (C12.0, C12.1, C12.2, C12.3, C12.4, C12.5, C12.6, C12.7, C12.8, C12.9)                                   |
| - Blunt force                                                 |                                                                     | - Contact with object or animal (C2=1.2),<br>- Contact with person (C2=1.3),<br>- Crushing (C2=1.4),<br>- Abrading, rubbing (C2=1.6),<br>- Other specified contact with blunt force (C2=1.8),<br>- Unspecified contact with blunt force (C2=1.9) | C13 (C13.2 (C13.21, C13.22, C13.23, C13.25, C13.28, C13.29)<br>C13.3, C13.4, C13.9)                          |
| - Piercing/penetrating force                                  | - Piercing/penetrating force (C2=2)                                 |                                                                                                                                                                                                                                                  | C2 (C2.1, C2.2 (C2.20, C2.22, C2.23, C2.24), C2.4 (C2.41, C2.42, C2.43, C2.45, C2.47, C2.48), C2.8, C2.9)    |
| - Other mechanical force                                      | - Other mechanical force (C2=3)                                     |                                                                                                                                                                                                                                                  | C3(C3.1, C3.2, C3.8, C3.9).                                                                                  |
| - Physical-over-exertion                                      | - Physical-over-exertion (C2=7)                                     |                                                                                                                                                                                                                                                  | C7                                                                                                           |

|                                                                      |                                                                                                                         |                                                                                                                                         |
|----------------------------------------------------------------------|-------------------------------------------------------------------------------------------------------------------------|-----------------------------------------------------------------------------------------------------------------------------------------|
| - Exposure to chemical or other substance                            | - Exposure to chemical or other substance (C2=6)                                                                        | C6                                                                                                                                      |
| - Thermal mechanism                                                  | - Thermal mechanism (C2=4)                                                                                              | C4 (C4.1(C4.11, C4.12, C4.13, C4.14, C4.15, C4.16, C4.17, C4.18, C4.19), C4.2 (C4.21, C4.22, C4.28, C4.29), C4.8, C4.9)                 |
| - Threat to breathing                                                | - Threat to breathing (C2=5)                                                                                            | C5.2 (C5.21, C5.22, C5.23, C5.24, C5.25), C5.3, C5.8, C5.9                                                                              |
| - Exposure to natural disaster or other force of nature              | - Exposure (effect of) to whether, natural disaster, or other force of nature (C2=8)                                    | C8 (C8.1, C8.2, C8.5, C8.8, C8.9)                                                                                                       |
| - Others and unknown                                                 | - Complications of health care (C2=20)                                                                                  |                                                                                                                                         |
|                                                                      | - Other specified mechanism of injury (C2=98)                                                                           | C98 (C98.1 (C98.11, C98.12, C98.13, C98.14, C98.15, C98.18, C98.19) C98.2 (C98.21, C98.22, C98.24, C98.27), C98.3, C98.4, C98.6), C98.8 |
|                                                                      | - Unspecified mechanism of injury (C2=99)                                                                               | C99                                                                                                                                     |
| <b>Activity when injured</b>                                         | <b>Activity when injured (C5=1-8, 98, 99)</b>                                                                           | <b>Activity when injured (27)</b>                                                                                                       |
| - Vital activity                                                     | - Vital activity (C5=6)                                                                                                 | C5                                                                                                                                      |
| - Leisure, play or travel                                            | - Leisure or play (C5=5)                                                                                                | C6                                                                                                                                      |
|                                                                      | - Travelling not elsewhere classified (C5=8)                                                                            | C8                                                                                                                                      |
| - Paid work                                                          | - Paid work (C5=1)                                                                                                      | C1                                                                                                                                      |
| - Unpaid work                                                        | - Unpaid work (C5=2)                                                                                                    | C2                                                                                                                                      |
| - Sports and exercise during leisure time                            | - Sports and exercise during leisure time (C5=4)                                                                        | C4                                                                                                                                      |
| - Others and unknown                                                 | - Education (C5=3)                                                                                                      | C3                                                                                                                                      |
|                                                                      | - Being taken care of (C5=7)                                                                                            | C7                                                                                                                                      |
|                                                                      | - Other specified activity (C5=98)                                                                                      | C98                                                                                                                                     |
|                                                                      | - Unspecified activity (C5=99)                                                                                          | C99                                                                                                                                     |
| <b>Alcohol use</b>                                                   | <b>Alcohol use (C6=1-5)</b>                                                                                             | <b>Alcohol use (19)</b>                                                                                                                 |
| - No evidence of alcohol use                                         | - No suspicion or evidence of alcohol use by any person involved in the injury event (C6=2)                             | C2                                                                                                                                      |
| - Alcohol use by the injured person                                  | - Suspicion or evidence of alcohol use by the injured person (C6=3)                                                     | C3                                                                                                                                      |
| - No information available                                           | - No information available (C6=1)                                                                                       | C1                                                                                                                                      |
| - Alcohol use by the both injured person and other person/s involved | - Suspicion or evidence of alcohol use by both the injured person and other persons involved in the injury event (C6=5) | C5                                                                                                                                      |
| - Alcohol use by other person/s involved                             | - Suspicion or evidence of alcohol use by other persons involved in the injury event (C6=4)                             | C4                                                                                                                                      |
| <b>Intent</b>                                                        | <b>Intent (C1=1-6, 8, 9)</b>                                                                                            | <b>Intent (18)</b>                                                                                                                      |
| - Unintentional                                                      | - Unintentional (C1=1)                                                                                                  | C1                                                                                                                                      |
| - Assault                                                            | - Assault (C1=3)                                                                                                        | C3                                                                                                                                      |

|                         |                                                    |     |
|-------------------------|----------------------------------------------------|-----|
| - Intentional self-harm | - Intentional self-harm (C1=2)                     | C2  |
| - Others and unknown    | - Other Violence (C1=4)                            | C98 |
|                         | - Undetermined intent (C1=5)                       |     |
|                         | - Complications of medical or surgical care (C1=6) |     |
|                         | - Other specified intent (C1=8)                    |     |
|                         | - Unspecified intent (C1=9)                        |     |
